# Supplementary material for: Processing Speed is Related to the General Psychopathology Factor in Youth
Source: Springer Nature journal article supplement (doi:10.1007/s10802-023-01049-w), 2023-04-22
Supplement: MOESM1 [file 25272876]

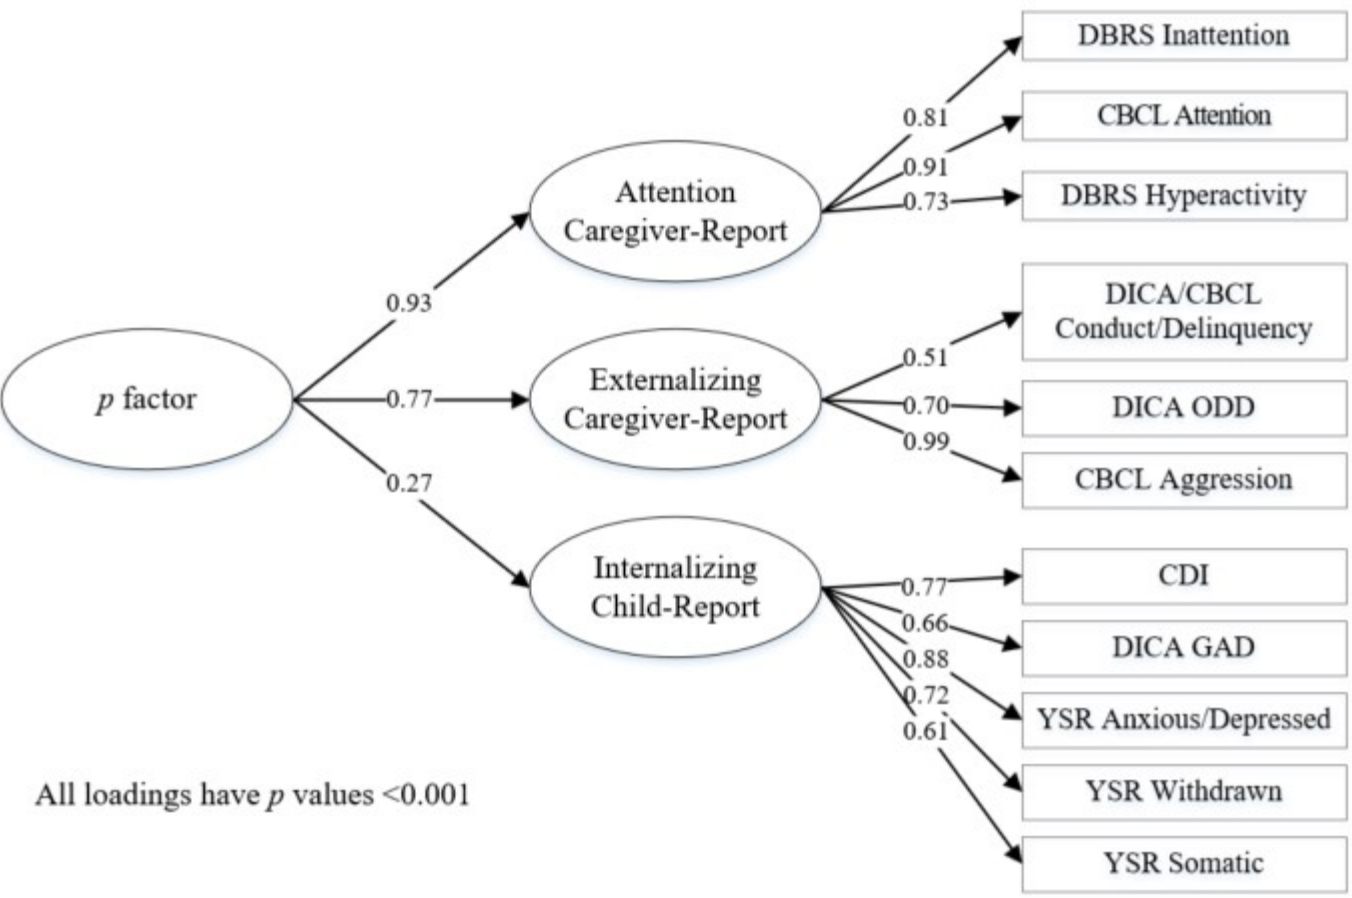

All loadings have  $p$  values  $<0.001$
